# Supplementary material
Source: PubMed Central journal article supplement (PMC4563732)
Supplement: supp_M114.047225_mcp.M114.047225-2.pdf [file supp_M114.047225_mcp.M114.047225-2.pdf]

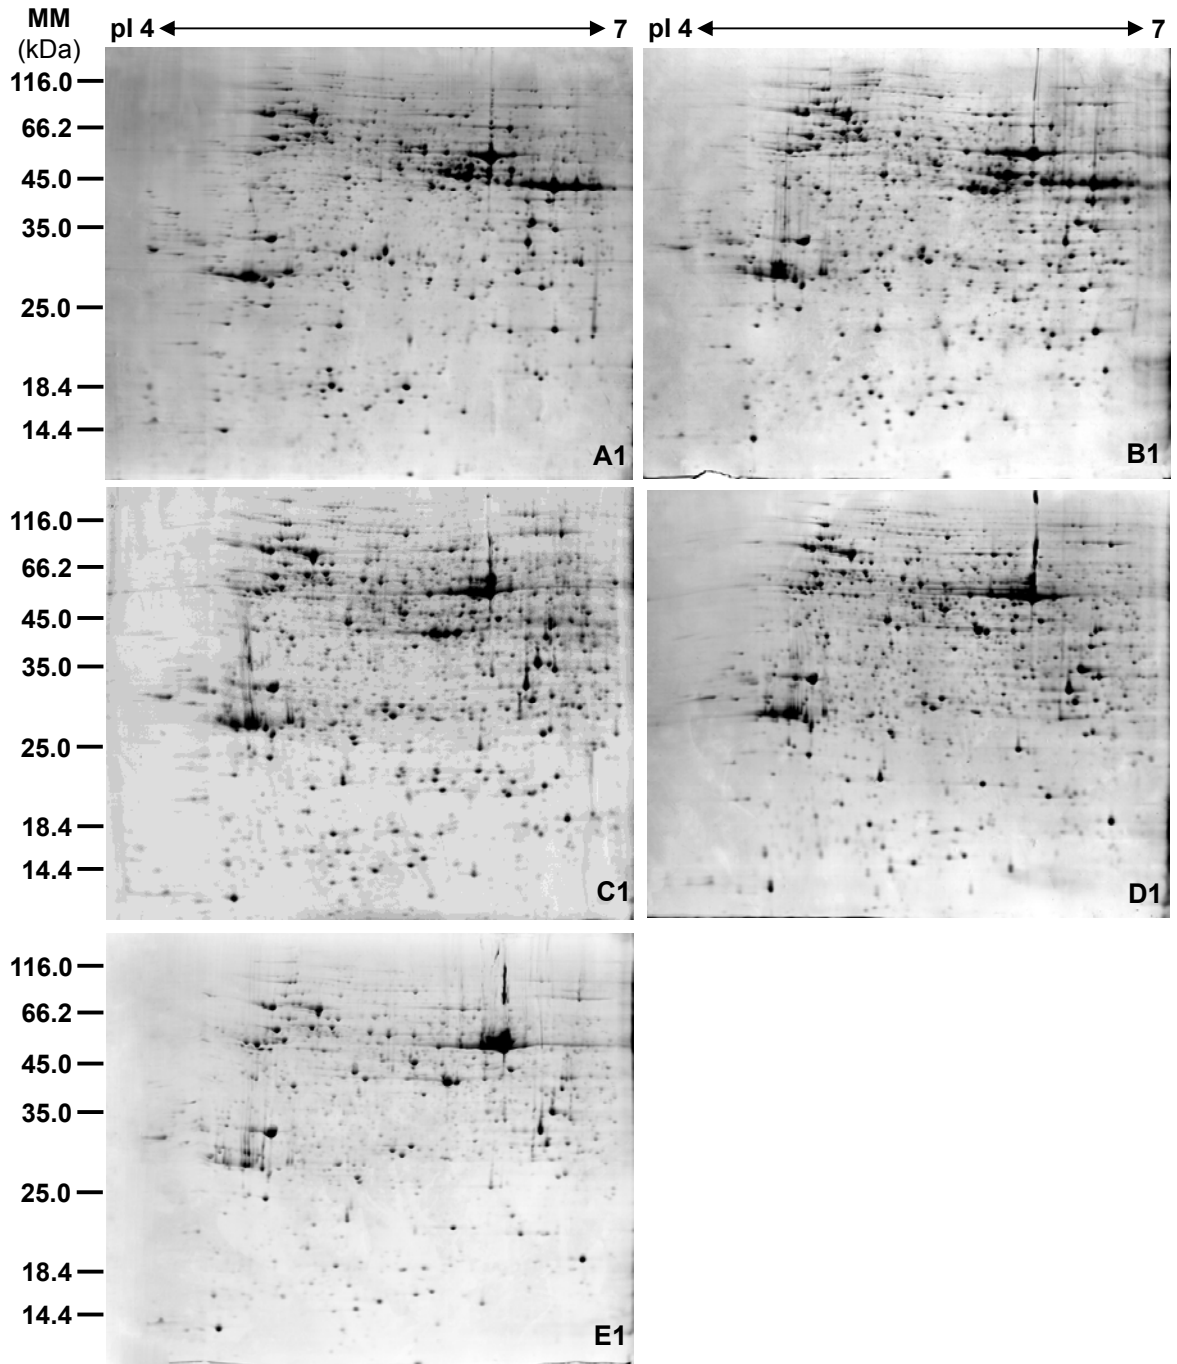

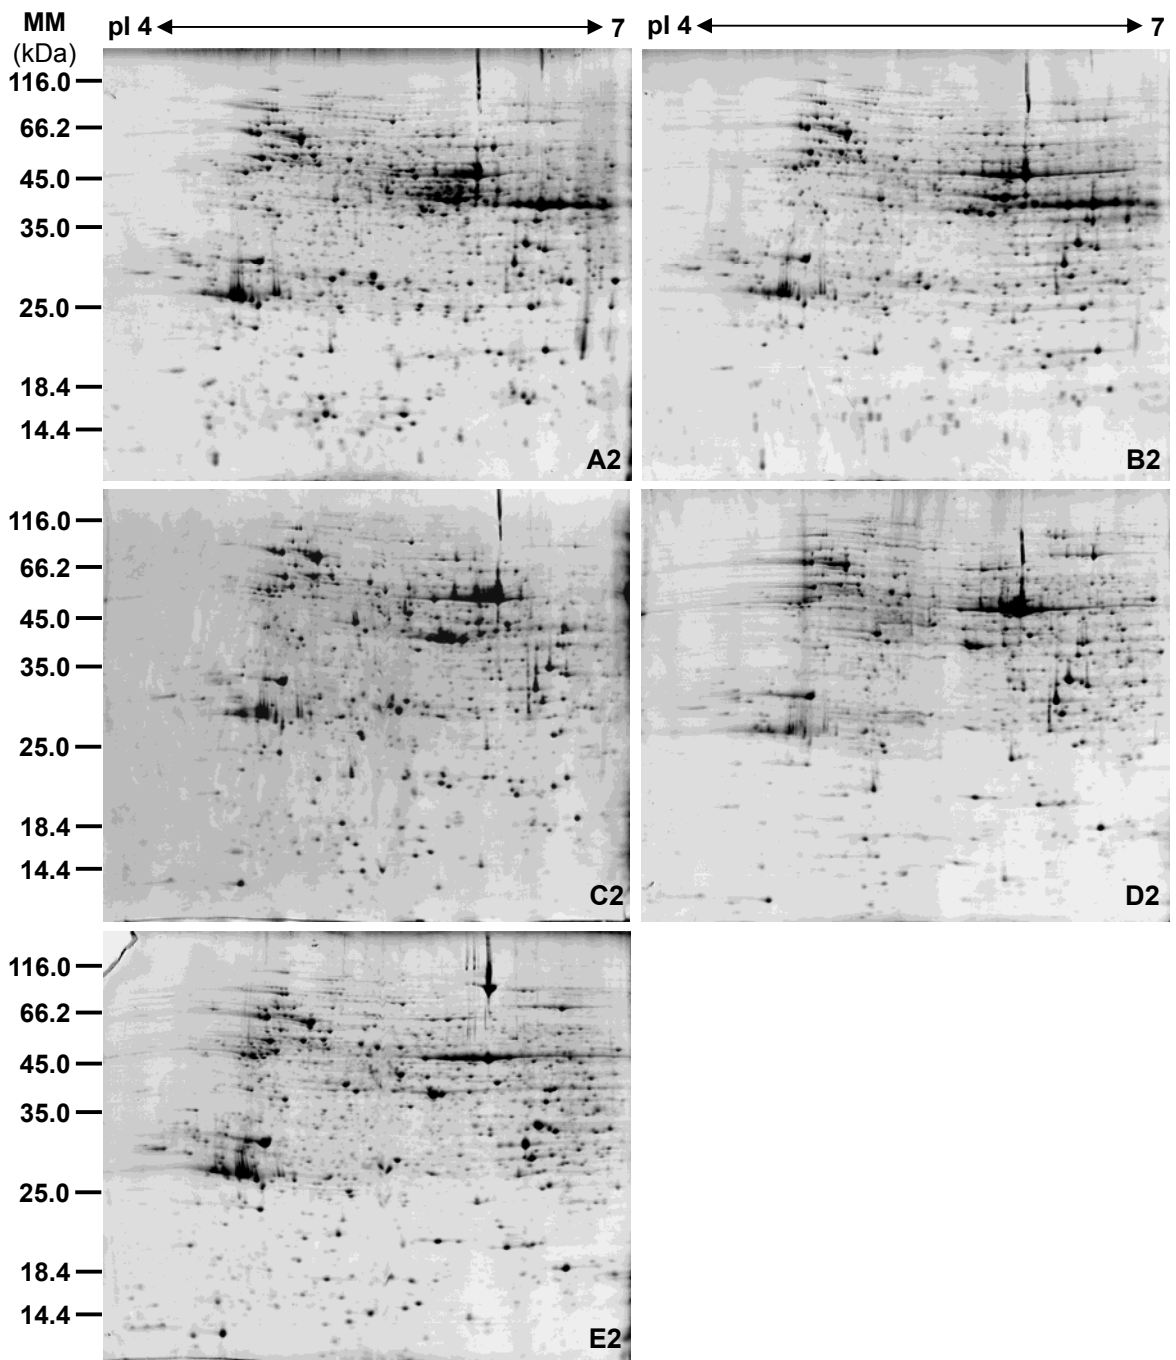

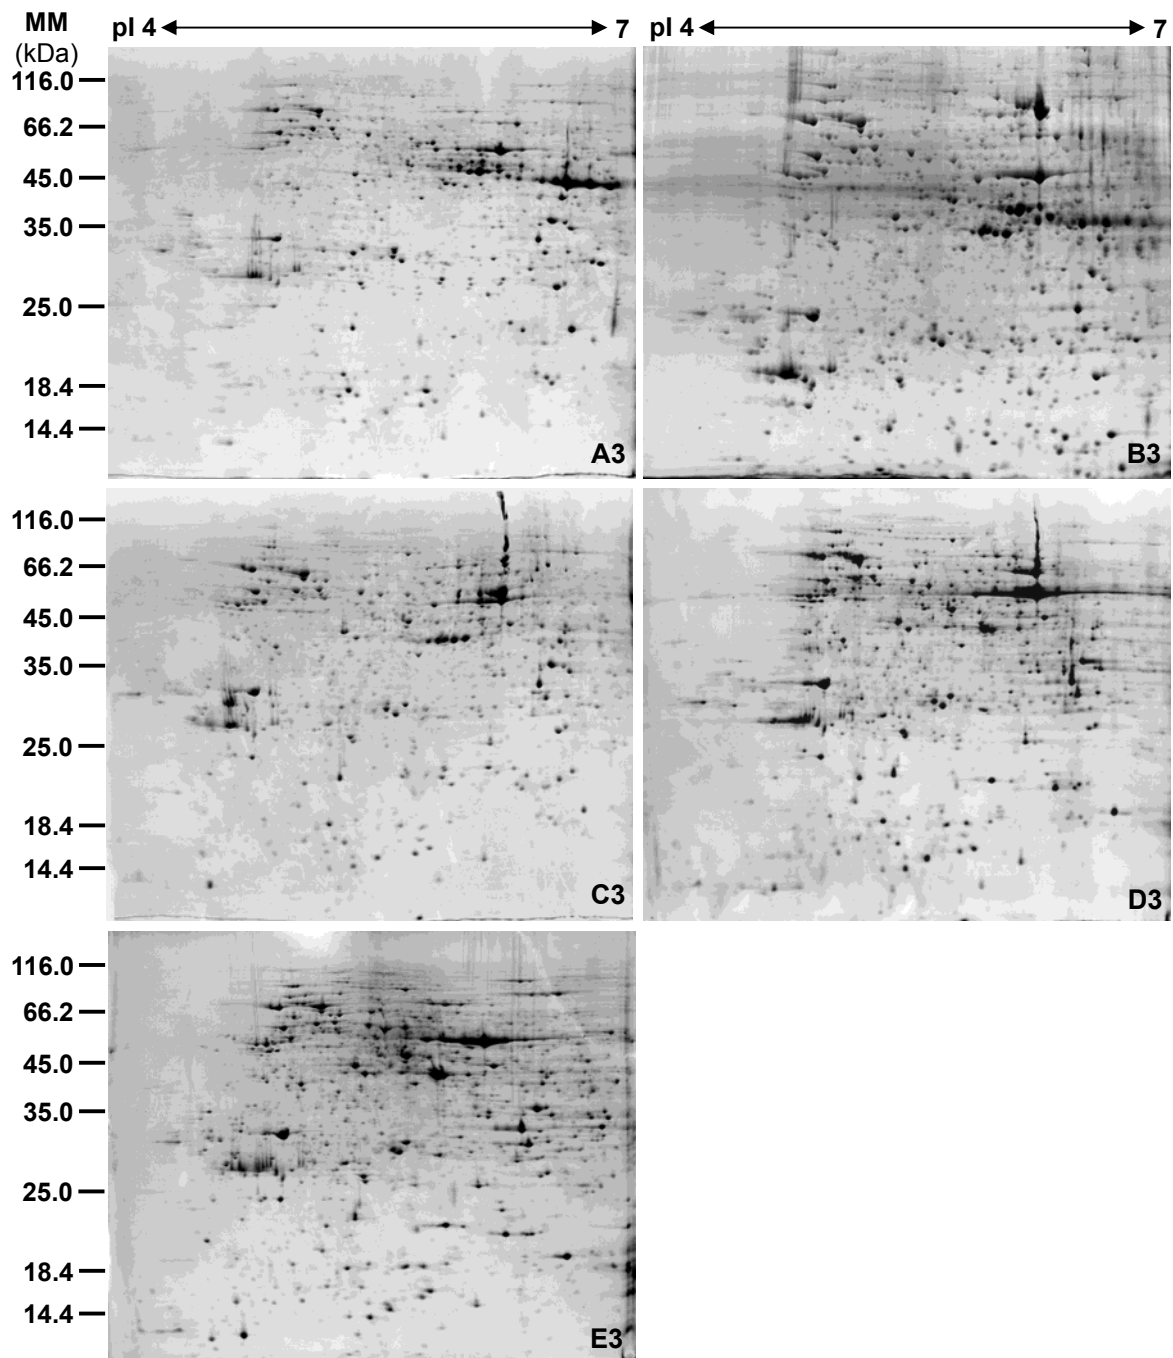

**Supplemental Figure S2. Three biological replicates of Coomassie Brilliant Blue-stained 2-DE gels from mature and germinating spores of *O. cinnamomea* L. var. *asiatica*.** Protein samples were extracted from spores at the five germination stages, respectively, and separated on 24 cm IPG strips (pH 4-7 linear gradient) using IEF in the first dimension, followed by 12.5% SDS-PAGE gels in the second dimension. The gels were stained with Coomassie Brilliant Blue. A total of 113 differentially expressed proteins

identified by ESI-Q-TOF MS were marked with numbers on the gels. Detailed information can be found in Table 1. Molecular weight (MM) in kDa and pI of proteins are indicated on the left and top of the gels, respectively. *A1-A3*, Mature spores. *B1-B3*, Rehydrated spores. *C1-C3*, Double-celled spores. *D1-D3*, Germinated spores. *E1-E3*, Spores with protonemal cells.
